# Supplementary material for: Synthesis of siRNA nanoparticles to silence plaque-destabilizing gene in atherosclerotic lesional macrophages
Source: Springer Nature journal article supplement (doi:10.1038/s41596-021-00665-4), 2022-02-04
Supplement: MOESM1 [file 41596_2021_665_MOESM1_ESM16.pdf]

---

## Supplementary information

---

# Synthesis of siRNA nanoparticles to silence plaque-destabilizing gene in atherosclerotic lesional macrophages

---

In the format provided by the  
authors and unedited

## Supplementary Information

### **Synthesis of siRNA nanoparticles to silence plaque-destabilizing gene in atherosclerotic lesional macrophages**

Xiangang Huang<sup>1†</sup>, Chuang Liu<sup>1†</sup>, Na Kong<sup>1</sup>, Yufen Xiao<sup>1</sup>, Arif Yurdagul Jr.<sup>2</sup>, Ira Tabas<sup>3,4,5</sup>, Wei Tao<sup>1\*</sup>

<sup>1</sup>Center for Nanomedicine and Department of Anesthesiology, Brigham and Women's Hospital, Harvard Medical School, Boston, MA 02115, USA. <sup>2</sup>Department of Molecular and Cellular Physiology, LSU Health Shreveport, Shreveport, LA, 71130, USA. <sup>3</sup>Department of Medicine, Columbia University Irving Medical Center, New York, NY 10032, USA. <sup>4</sup>Department of Physiology and Cellular Biophysics, Columbia University Irving Medical Center, New York, NY 10032, USA. <sup>5</sup>Department of Pathology and Cell Biology, Columbia University Irving Medical Center, New York, NY 10032, USA.

<sup>†</sup>These authors contributed equally to this work.

\*Corresponding author. Email: wtao@bwh.harvard.edu

**a**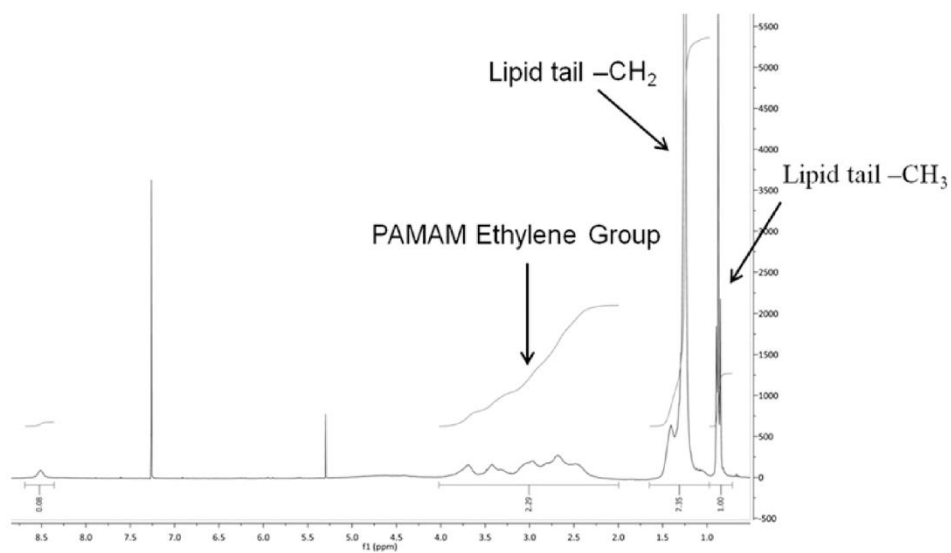**b**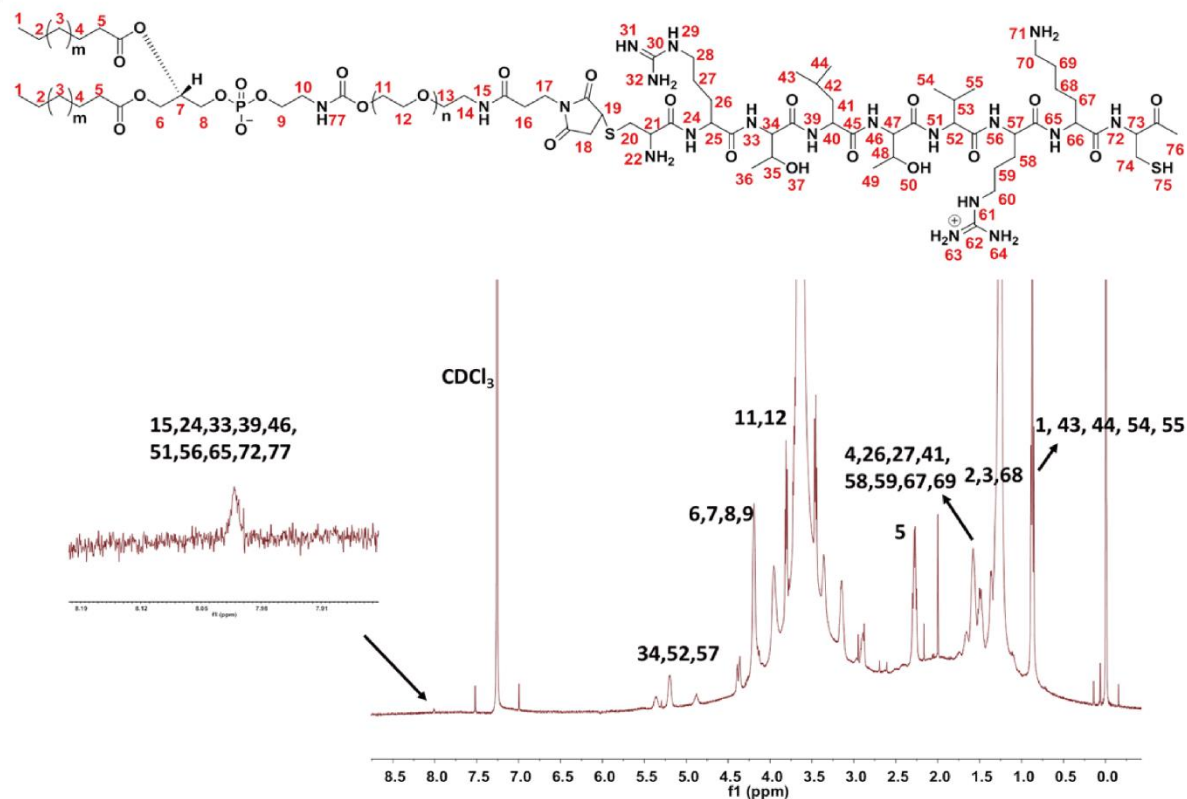

**Supplementary Figure 1.**  $^1\text{H}$  NMR analysis. **a**, G0-C14 ( $\text{CDCl}_3$ ). Adapted with permission from ref.<sup>1</sup>, National Academy of Sciences; **b**, DSPE-PEG-S2P ( $\text{CDCl}_3$ ). Adapted with permission from ref.<sup>2</sup>, American Association for the Advancement of Science.

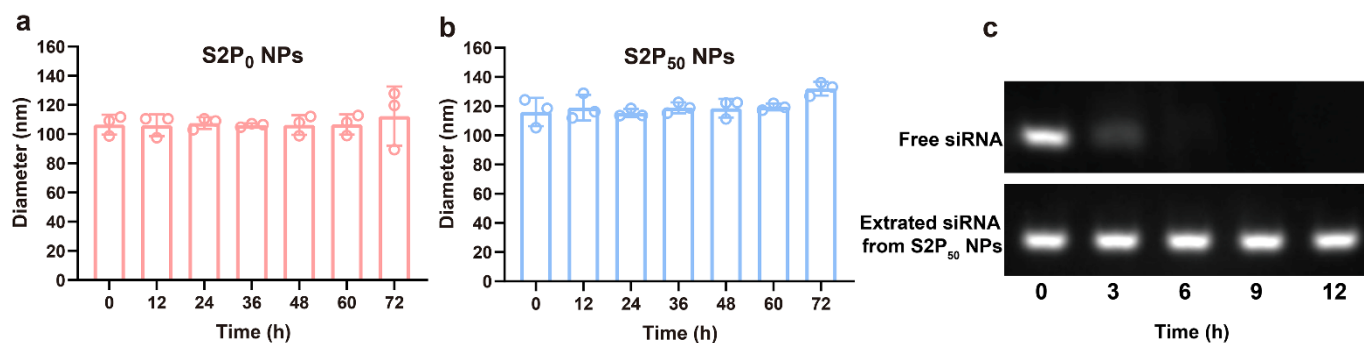

**Supplementary Figure 2.** Serum stability and protective effect of siRNA-loaded NPs for siRNA. **a-b**, Stability of S2P<sub>0</sub> and S2P<sub>50</sub> NPs in PBS solution containing 10% serum at 37 °C was determined by monitoring the particle size using DLS over 3 days. n = 3. Data are presented as mean ± SEM. **c**, Protective effect of siRNA-loaded NPs for siRNA in 10% (vol/vol) serum medium was characterized by assessing the extrated siRNA from S2P<sub>50</sub> NPs using agarose gel electrophoresis. **a-c**, Adapted with permission from ref.<sup>2</sup>, American Association for the Advancement of Science.

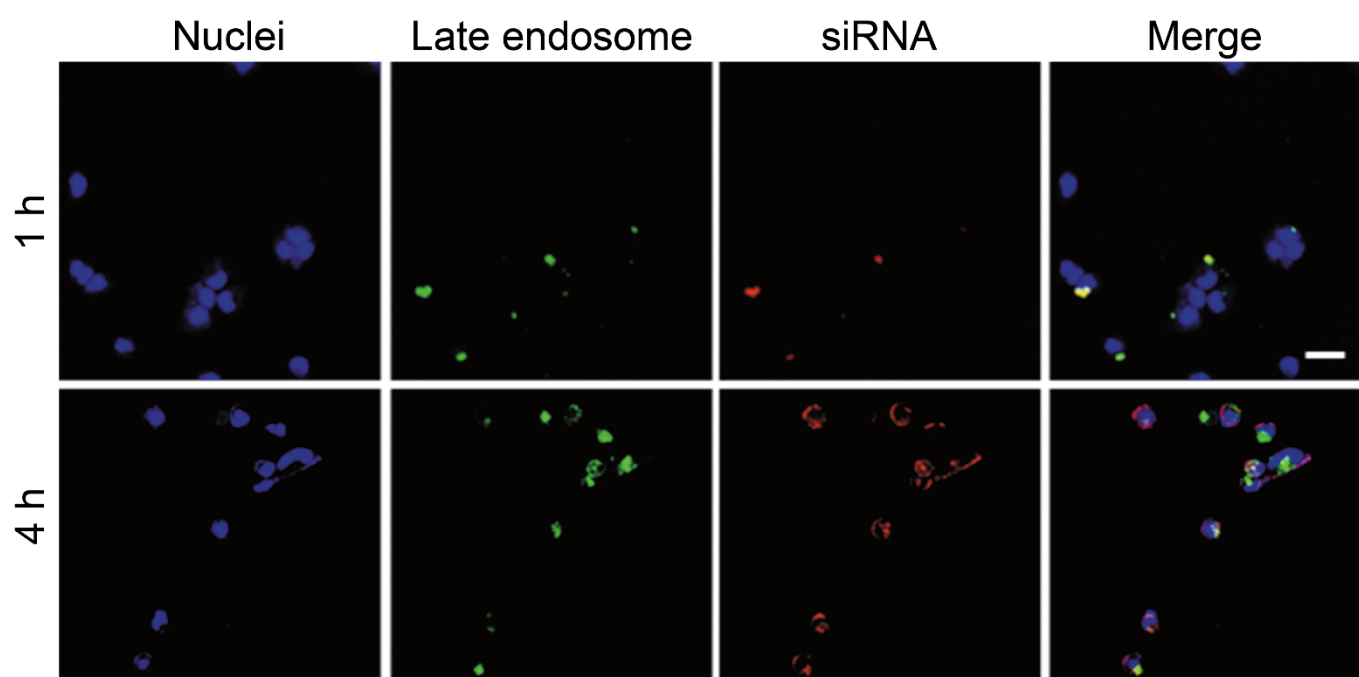

**Supplementary Figure 3.** Endosomal escape of siRNA-loaded NPs. Confocal microscopy images of HeLa-Luc cells treated with Dy647-siRNA-loaded S2P<sub>50</sub> NPs (red) for 1 and 4 h. The late endosomes were stained with LysoTracker Green (green) and the nuclei were stained with Hoechst 33342 (Blue). Adapted with permission from ref.<sup>2</sup>, American Association for the Advancement of Science.

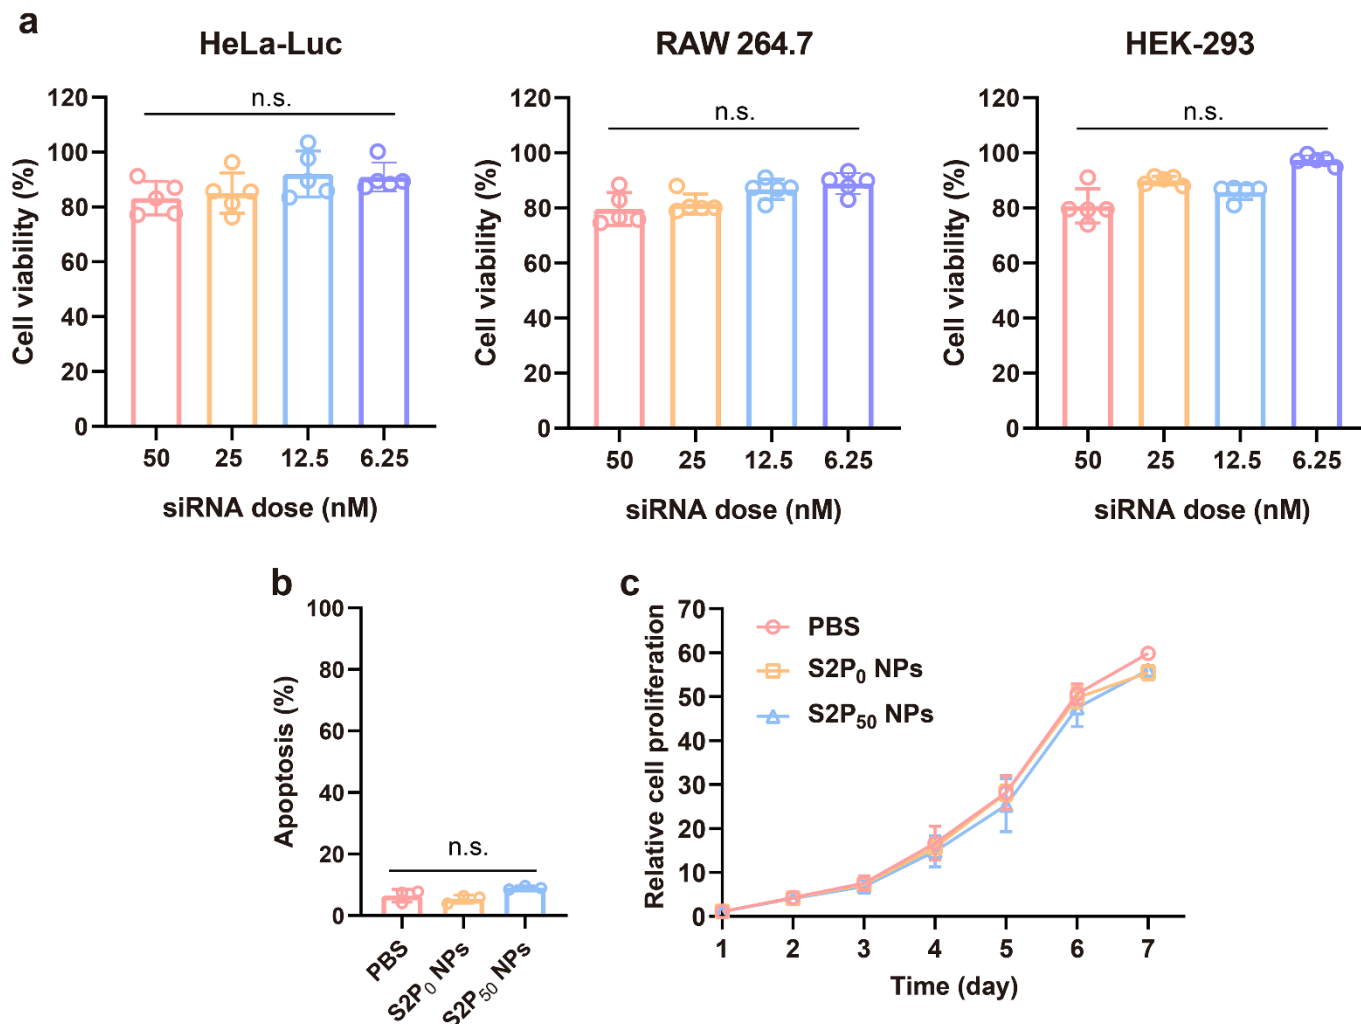

**Supplementary Figure 4.** In vitro biocompatibility of siRNA-loaded NPs. **a**, HeLa-luc, RAW 264.7 and HEK-293 cells were treated with S2P<sub>50</sub> NPs (siLuc 6.25-50 nM) for 24 h. After another 48 h incubation with fresh medium, the viability of the cells was assessed using alamarBlue reagent (n.s., not significant). n = 5. Data are presented as mean  $\pm$  SEM. **b**, RAW 264.7 cells were treated with PBS, S2P<sub>0</sub> NPs and S2P<sub>50</sub> NPs (siLuc 50 nM) for 24 h. After another 48 h incubation with fresh medium, the apoptosis of the cells was assessed using Annexin V-FITC and propidium iodide (PI) (Annexin V-FITC Apoptosis Detection kit). n = 3. **c**, RAW 264.7 cells were treated with PBS, S2P<sub>0</sub> NPs and S2P<sub>50</sub> NPs (siLuc 50 nM) for 24 h. After another 48 h incubation with fresh medium, the proliferation of the cells was assessed using alamarBlue reagent. n = 3. **a-c**, Adapted with permission from ref.<sup>2</sup>, American Association for the Advancement of Science.

## References

- 1 Xu, X. *et al.* Enhancing tumor cell response to chemotherapy through nanoparticle-mediated codelivery of siRNA and cisplatin prodrug. *Proc. Natl. Acad. Sci.* **110**, 18638-18643 (2013).
- 2 Tao, W. *et al.* siRNA nanoparticles targeting CaMKII $\gamma$  in lesional macrophages improve atherosclerotic plaque stability in mice. *Sci. Transl. Med.* **12**, eaay1063 (2020).
