# Supplementary material for: Synthesis of siRNA nanoparticles to silence plaque-destabilizing gene in atherosclerotic lesional macrophages
Source: Springer Nature journal article supplement (doi:10.1038/s41596-021-00665-4), 2022-02-04
Supplement: MOESM2 [file 41596_2021_665_MOESM2_ESM17.pdf]

## Reporting Summary

Nature Research wishes to improve the reproducibility of the work that we publish. This form provides structure for consistency and transparency in reporting. For further information on Nature Research policies, see our [Editorial Policies](#) and the [Editorial Policy Checklist](#).

### Statistics

For all statistical analyses, confirm that the following items are present in the figure legend, table legend, main text, or Methods section.

n/a Confirmed

- ☐ ☒ The exact sample size ( $n$ ) for each experimental group/condition, given as a discrete number and unit of measurement
- ☐ ☒ A statement on whether measurements were taken from distinct samples or whether the same sample was measured repeatedly
- ☐ ☒ The statistical test(s) used AND whether they are one- or two-sided  
*Only common tests should be described solely by name; describe more complex techniques in the Methods section.*
- ☒ ☐ A description of all covariates tested
- ☐ ☒ A description of any assumptions or corrections, such as tests of normality and adjustment for multiple comparisons
- ☐ ☒ A full description of the statistical parameters including central tendency (e.g. means) or other basic estimates (e.g. regression coefficient) AND variation (e.g. standard deviation) or associated estimates of uncertainty (e.g. confidence intervals)
- ☐ ☒ For null hypothesis testing, the test statistic (e.g.  $F$ ,  $t$ ,  $r$ ) with confidence intervals, effect sizes, degrees of freedom and  $P$  value noted  
*Give  $P$  values as exact values whenever suitable.*
- ☒ ☐ For Bayesian analysis, information on the choice of priors and Markov chain Monte Carlo settings
- ☒ ☐ For hierarchical and complex designs, identification of the appropriate level for tests and full reporting of outcomes
- ☐ ☒ Estimates of effect sizes (e.g. Cohen's  $d$ , Pearson's  $r$ ), indicating how they were calculated

*Our web collection on [statistics for biologists](#) contains articles on many of the points above.*

### Software and code

Policy information about [availability of computer code](#)

Data collection N/A

Data analysis N/A

For manuscripts utilizing custom algorithms or software that are central to the research but not yet described in published literature, software must be made available to editors and reviewers. We strongly encourage code deposition in a community repository (e.g. GitHub). See the Nature Research [guidelines for submitting code & software](#) for further information.

### Data

Policy information about [availability of data](#)

All manuscripts must include a [data availability statement](#). This statement should provide the following information, where applicable:

- Accession codes, unique identifiers, or web links for publicly available datasets
- A list of figures that have associated raw data
- A description of any restrictions on data availability

The data that support this study are available within the paper and its Supplementary Information. All primary data underlying the figures reported in the article can be obtained from the corresponding author upon reasonable request.

## Field-specific reporting

Please select the one below that is the best fit for your research. If you are not sure, read the appropriate sections before making your selection.

☒ Life sciences ☐ Behavioural & social sciences ☐ Ecological, evolutionary & environmental sciences

For a reference copy of the document with all sections, see [nature.com/documents/nr-reporting-summary-flat.pdf](https://www.nature.com/documents/nr-reporting-summary-flat.pdf)

## Life sciences study design

All studies must disclose on these points even when the disclosure is negative.

|                 |                                                                                                                                                                                                                                                                                                                                                                                                    |
|-----------------|----------------------------------------------------------------------------------------------------------------------------------------------------------------------------------------------------------------------------------------------------------------------------------------------------------------------------------------------------------------------------------------------------|
| Sample size     | No statistical methods were used to predetermine the sample sizes. The number of animals in each group was determined according to previous studies cited in our manuscript. The size of each sample is in close agreement with those studies already published and with the need for statistical analysis to discuss the degree of differences and measure the variability of these in vivo data. |
| Data exclusions | No data were excluded from the analysis.                                                                                                                                                                                                                                                                                                                                                           |
| Replication     | All statistical data shown in this paper are based on the paper we published in Science Translation Medicine (Sci Transl Med 12, eaay1063.) All the experimental findings were replicated with the number of replicates, animals and variation shown by n and SD.                                                                                                                                  |
| Randomization   | Therapeutics study: animals were distributed randomly into different groups. Each specific treatment was administrated to animals according to established schedules and regimens.                                                                                                                                                                                                                 |
| Blinding        | Investigators were blinded when performing therapeutic study. During the experiments designed to evaluate the therapeutic efficiacy , animals were randomly divided into control and treatment groups.                                                                                                                                                                                             |

## Reporting for specific materials, systems and methods

We require information from authors about some types of materials, experimental systems and methods used in many studies. Here, indicate whether each material, system or method listed is relevant to your study. If you are not sure if a list item applies to your research, read the appropriate section before selecting a response.

### Materials & experimental systems

| n/a                                 | Involved in the study                                           |
|-------------------------------------|-----------------------------------------------------------------|
| <input type="checkbox"/>            | <input checked="" type="checkbox"/> Antibodies                  |
| <input type="checkbox"/>            | <input checked="" type="checkbox"/> Eukaryotic cell lines       |
| <input checked="" type="checkbox"/> | <input type="checkbox"/> Palaeontology and archaeology          |
| <input type="checkbox"/>            | <input checked="" type="checkbox"/> Animals and other organisms |
| <input checked="" type="checkbox"/> | <input type="checkbox"/> Human research participants            |
| <input checked="" type="checkbox"/> | <input type="checkbox"/> Clinical data                          |
| <input checked="" type="checkbox"/> | <input type="checkbox"/> Dual use research of concern           |

### Methods

| n/a                                 | Involved in the study                              |
|-------------------------------------|----------------------------------------------------|
| <input checked="" type="checkbox"/> | <input type="checkbox"/> ChIP-seq                  |
| <input type="checkbox"/>            | <input checked="" type="checkbox"/> Flow cytometry |
| <input checked="" type="checkbox"/> | <input type="checkbox"/> MRI-based neuroimaging    |

## Antibodies

|                 |                                                                                                                                                                                                                                                                                                                                                                                                                                                                                                                                                                                                                                                                                                                                                                                                                                                                                                                         |
|-----------------|-------------------------------------------------------------------------------------------------------------------------------------------------------------------------------------------------------------------------------------------------------------------------------------------------------------------------------------------------------------------------------------------------------------------------------------------------------------------------------------------------------------------------------------------------------------------------------------------------------------------------------------------------------------------------------------------------------------------------------------------------------------------------------------------------------------------------------------------------------------------------------------------------------------------------|
| Antibodies used | Anti-CaMKII $\gamma$ (1:400, Novus Biologicals, cat. no. NBP2-15685). <a href="https://scicrunch.org/resolver/RRID:AB_2892990">https://scicrunch.org/resolver/RRID:AB_2892990</a> . (Novus, Cat# NBP2-15685, RRID:AB_2892990)<br>Anti-Mac2 antibody (1:10,000, Cedarlane Labs, cat. no. CL8942AP). <a href="https://scicrunch.org/resolver/RRID:AB_2814900">https://scicrunch.org/resolver/RRID:AB_2814900</a> . (Fluidigm Cat# 3153026B, RRID:AB_2814900)<br>Anti-MerTK (1:500, R&D Systems, cat. no. AF591). <a href="https://scicrunch.org/resolver/RRID:AB_2098565">https://scicrunch.org/resolver/RRID:AB_2098565</a> . (R and D Systems Cat# AF591, RRID:AB_2098565).<br>Alexa Fluor 647 Goat-anti Mouse IgG (Life Technologies, A-28181). <a href="https://scicrunch.org/resolver/RRID:AB_2536165">https://scicrunch.org/resolver/RRID:AB_2536165</a> . (Thermo Fisher Scientific Cat# A28181, RRID:AB_2536165). |
| Validation      | Anti-CaMKII $\gamma$ (1:400, Novus Biologicals, cat. no. NBP2-15685), Predicted Species: Rat (100%), Porcine (100%), Bovine (100%), Rabbit (100%), Rhesus Macaque (100%), Xenopus (97%). Application: Western Blot 1:500-1:3000, Immunocytochemistry/Immunofluorescence 1:100-1:1000, Immunohistochemistry, Immunohistochemistry-Paraffin<br><br>Anti-Mac2 antibody (1:10,000, Cedarlane Labs, cat. no. CL8942AP), reactivity : human, mouse, rat; Application: immunohistochemistry, immunohistochemistry - paraffin section, immunohistochemistry - frozen section, immunohistochemistry knockout validation.<br><br>Anti-MerTK (1:500, R&D Systems, cat. no. AF591). Species Reactivity: Mouse. Application: Flow Cytometry 2.5 $\mu$ g/106 cells, Immunohistochemistry 1-15 $\mu$ g/mL, CyTOF-ready, Dual RNAscope ISH-IHC.                                                                                         |

Alexa Fluor 647 Goat-anti Mouse IgG (Life Technologies, A-28181). Species Reactivity: Mouse. Application: Immunohistochemistry (Frozen) (IHC (F)), Flow Cytometry (Flow), Immunocytochemistry (ICC/IF), Miscellaneous PubMed (Misc)

## Eukaryotic cell lines

Policy information about [cell lines](#)

|                                                                      |                                                                                                                                                                                                                                                                                                                                                                                                                                                                                                                                                                                                                                               |
|----------------------------------------------------------------------|-----------------------------------------------------------------------------------------------------------------------------------------------------------------------------------------------------------------------------------------------------------------------------------------------------------------------------------------------------------------------------------------------------------------------------------------------------------------------------------------------------------------------------------------------------------------------------------------------------------------------------------------------|
| Cell line source(s)                                                  | HeLa-Luc cells (a HeLa cell line stably transfected with a firefly luciferase reporter gene, Sigma-Aldrich, cat. no. 11033106). <a href="https://scicrunch.org/resolver/RRID:CVCL_2939">https://scicrunch.org/resolver/RRID:CVCL_2939</a> . (ECACC Cat# 11033106, RRID:CVCL_2939)<br>RAW 264.7 (ATCC, TIB-71™). <a href="https://scicrunch.org/resolver/RRID:CVCL_0493">https://scicrunch.org/resolver/RRID:CVCL_0493</a> . (ATCC Cat# TIB-71, RRID:CVCL_0493)<br>HEK-293 (ATCC, CRL-1573™). <a href="https://scicrunch.org/resolver/RRID:CVCL_0045">https://scicrunch.org/resolver/RRID:CVCL_0045</a> . (ATCC Cat# CRL-1573, RRID:CVCL_0045) |
| Authentication                                                       | The cell lines used in the research are regularly checked to ensure they are authentic and are not infected with mycoplasma.                                                                                                                                                                                                                                                                                                                                                                                                                                                                                                                  |
| Mycoplasma contamination                                             | All cells were negative for mycoplasma.                                                                                                                                                                                                                                                                                                                                                                                                                                                                                                                                                                                                       |
| Commonly misidentified lines<br>(See <a href="#">ICLAC</a> register) | No commonly misidentified cell line were used.                                                                                                                                                                                                                                                                                                                                                                                                                                                                                                                                                                                                |

## Animals and other organisms

Policy information about [studies involving animals](#); [ARRIVE guidelines](#) recommended for reporting animal research

|                         |                                                                                                                                                                                                                                            |
|-------------------------|--------------------------------------------------------------------------------------------------------------------------------------------------------------------------------------------------------------------------------------------|
| Laboratory animals      | Ldlr <sup>-/-</sup> mice (The Jackson Laboratory, B6.129S7-Ldlrtm1Her/J, Stock No: 002207), Six- to eight-week-old male C57BL/6J mice, 6-week-old female and male BALB/c mice were purchased from the Jackson laboratory (Bar Harbor, ME). |
| Wild animals            | No wild animals were used in this study.                                                                                                                                                                                                   |
| Field-collected samples | This study did not involve samples collected from the fields.                                                                                                                                                                              |
| Ethics oversight        | All animals received humane care. All procedures were conducted in accordance with protocols approved by the Institutional Animal Care and Use Committees at Harvard Medical School and Columbia University Irving Medical Center.         |

Note that full information on the approval of the study protocol must also be provided in the manuscript.

## Flow Cytometry

### Plots

Confirm that:

- ☒ The axis labels state the marker and fluorochrome used (e.g. CD4-FITC).
- ☒ The axis scales are clearly visible. Include numbers along axes only for bottom left plot of group (a 'group' is an analysis of identical markers).
- ☐ All plots are contour plots with outliers or pseudocolor plots.
- ☒ A numerical value for number of cells or percentage (with statistics) is provided.

### Methodology

|                           |                                                                                                                                            |
|---------------------------|--------------------------------------------------------------------------------------------------------------------------------------------|
| Sample preparation        | Single cell suspensions from cultured cells were used for flow cytometry tests.                                                            |
| Instrument                | Flow cytometer (BD LSR Fortessa)                                                                                                           |
| Software                  | Flowjo v7.6                                                                                                                                |
| Cell population abundance | Relevant cell fractions were above 90% for all samples.                                                                                    |
| Gating strategy           | Generally, cells were first gated on FSC/SCC. Singlet cells were usually gated using FSC-H and FSC-A. Debris were removed by thresholding. |

- ☐ Tick this box to confirm that a figure exemplifying the gating strategy is provided in the Supplementary Information.
